# Supplementary material for: Diurnal dynamic behavior of microglia in response to infected bacteria through the UDP-P2Y6 receptor system
Source: PubMed Central journal article supplement (PMC4956748; doi:10.1038/srep30006), 2016-07-21
Supplement: srep30006-s5.pdf [file srep30006-s5.pdf]

## SUPPLEMENTARY INFORMATION

for

Diurnal dynamic behavior of microglia in response to infected bacteria through the  
UDP-P2Y<sub>6</sub> receptor system

Fumiko Takayama, Yoshinori Hayashi, Zhou Wu, Yicong Liu, Hiroshi Nakanishi

Supplementary information includes:

Supplementary Figures S1-S5

Supplementary Video S1-S4

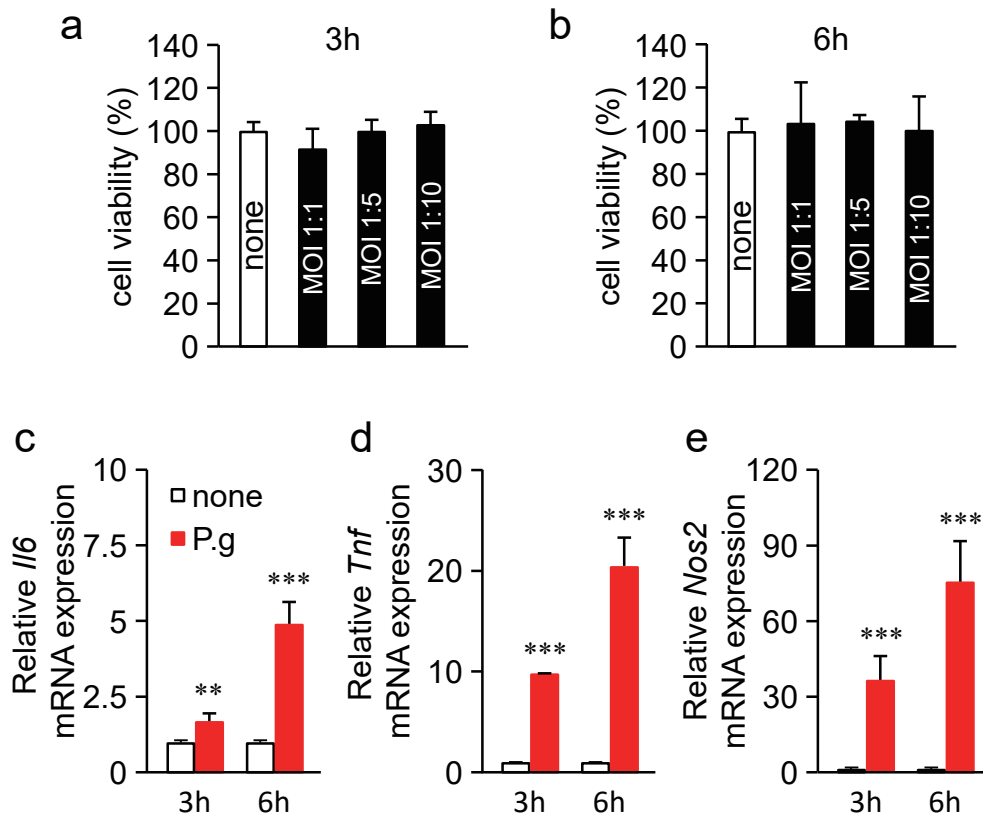

**Supplementary Figure S1.** Effects on the cell viability and the mRNA expression of proinflammatory-related molecules in MG6 cells following the infection with *P. gingivalis*. **(a,b)** Effects of *P. gingivalis* on cell viability in MG6 after infection with *P. gingivalis* at various MOIs; 1:1, 1:5, 1:10 for 3h **(a)** or 6h **(b)**. The data are presented as the mean  $\pm$  S.E.M. ( $n = 3$ , each). A one-way ANOVA with Dunnett's test as compared with non; MOI 1:1,  $p = 0.2911$ ; 1:5,  $p = 0.9999$ ; 1:10,  $p = 0.8629$  (3h), 1:1,  $p = 0.9767$ ; 1:5,  $p = 0.9508$ ; 1:10,  $p = 0.9999$  (6h). **(c-e)** The mRNA expression of proinflammatory-related molecules; **(c)** *Il6*, **(d)** *Tnf* **(e)** *Nos2* in MG6 cells after infection with *P. gingivalis* for 3h or 6h at MOI 1:5. The data are presented as the mean  $\pm$  S.E.M. ( $n = 3$ , each). A two-way repeated measure ANOVA with Sidak's test (non versus *P. gingivalis*); 3h: \*\* $p = 0.0192$ ; 6h: \*\*\* $p = 0.0001$ (c), 3h: \*\*\* $p = 0.0001$ , 6h: \*\*\* $p = 0.0001$  **(d)**, 3h: \*\*\* $p = 0.0001$ , 6h: \*\*\* $p = 0.0001$  **(e)**.

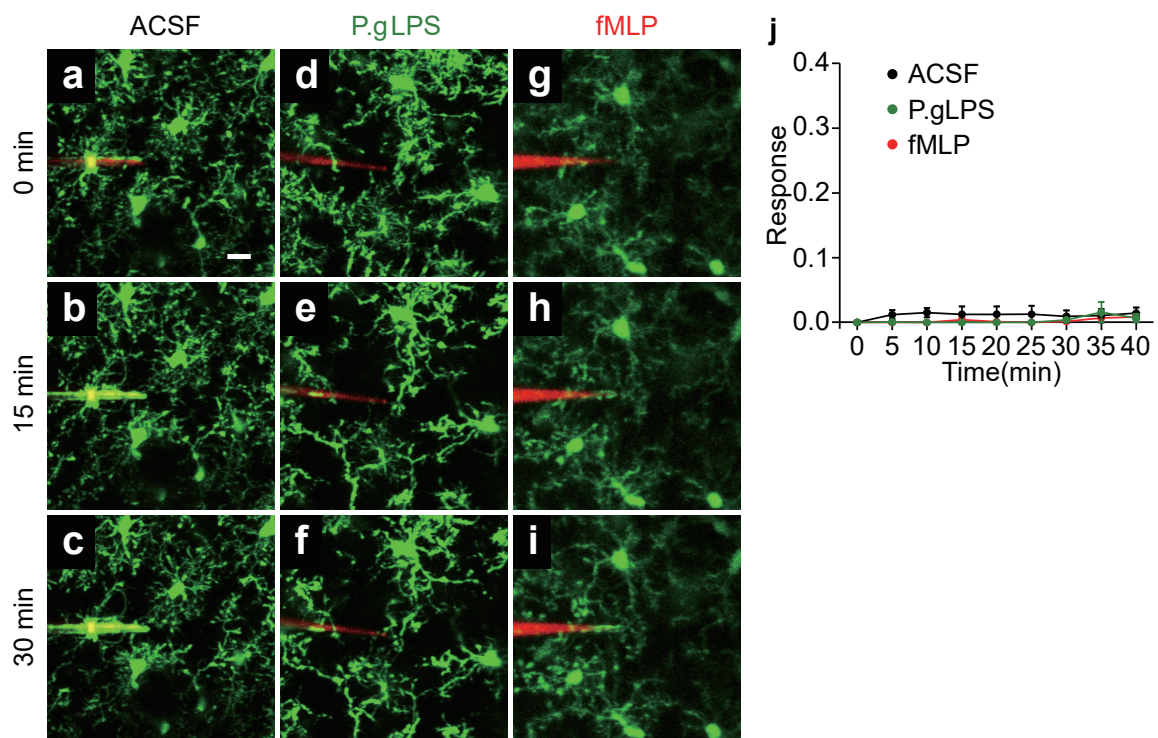

**Supplementary Figure S2.** *P.g* LPS and fMLP did not induce microglial response to the focal injection area. (a-c) ACSF, (d-f) 100  $\mu\text{g ml}^{-1}$  *P.g* LPS, (g-i) 10  $\mu\text{M}$  fMLP (j) The kinetics of the mean fluorescent change of microglial response to ACSF, *P.g* LPS and fMLP. Scale bar: 10  $\mu\text{m}$ . The data are presented as the mean  $\pm$  S.E.M. (N = 3 mice, n = 3-5 each). Two-way repeated measure ANOVA with Dunnett's test; from 10min to 40min:  $p = 0.3078$ ,  $p = 0.4363$ ,  $p = 0.4475$ ,  $p = 0.4212$ ,  $p = 0.8556$ ,  $p = 0.8570$ ,  $p = 0.7224$  for ACSF (control) vs *P.g* LPS,  $p = 0.4115$ ,  $p = 0.2542$ ,  $p = 0.6601$ ,  $p = 0.4595$ ,  $p = 0.3636$ ,  $p = 0.6978$ ,  $p = 0.9232$ ,  $p = 0.8096$  for ACSF vs fMLP.

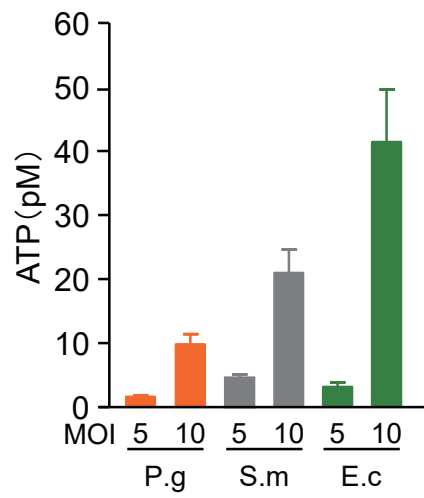

**Supplementary Figure S3.** MG6 cells released slightly few amount of ATP in response to various bacteria. The data are presented as the mean  $\pm$  S.E.M. (n = 3 each). MOI 1:5, 1:10, P. g; *P. gingivalis*, S.m; *S. mitis*, E.c; *E. coli*.

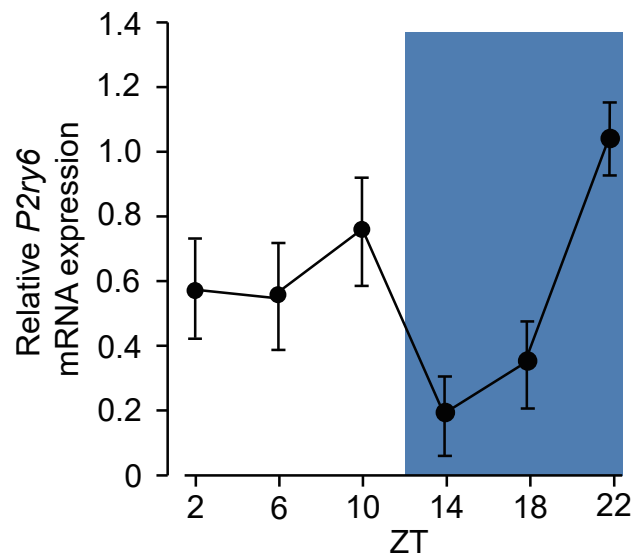

**Supplementary Figure S4.** Possible associations with the circadian variation of the microglial *P2ry6* expression. The circadian oscillations of the expression of *P2ry6* gene in cortical microglia in mice housed under the LD condition. The data are presented as the mean  $\pm$  S.E.M. (N=3 mice, n=3 each). One way Repeated measures ANOVA with a post hoc Tukey's test; ZT14 vs ZT10:  $p = 0.0039$ , ZT14 vs ZT22:  $p = 0.001$ , ZT22 vs ZT2:  $p = 0.0140$ , ZT22 vs ZT6:  $p = 0.0125$ , ZT22 vs ZT14:  $p = 0.001$ , ZT22 vs ZT18:  $p = 0.0007$ .

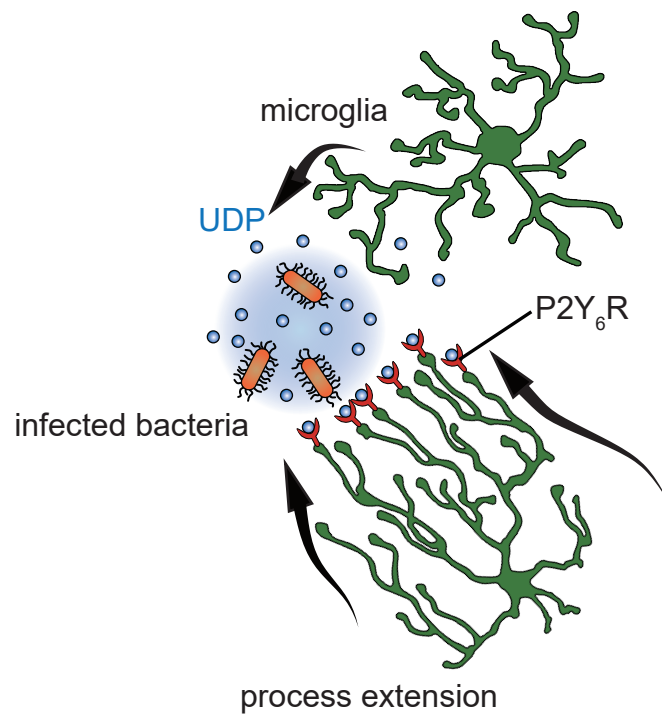

**Supplementary Figure S5.** A schematic diagram of microglial process extension to the infected bacteria through the UDP-P2Y<sub>6</sub>R system. Infected bacteria induce microglial process extension by secretion of UDP from microglia around the infection site .
